# Supplementary material for: Multi-Omic Identification of Venom Proteins Collected from Artificial Hosts of a Parasitoid Wasp
Source: MDPI journal article supplement (doi:10.3390/toxins15060377), 2023-06-03
Supplement: s1 [file s1]

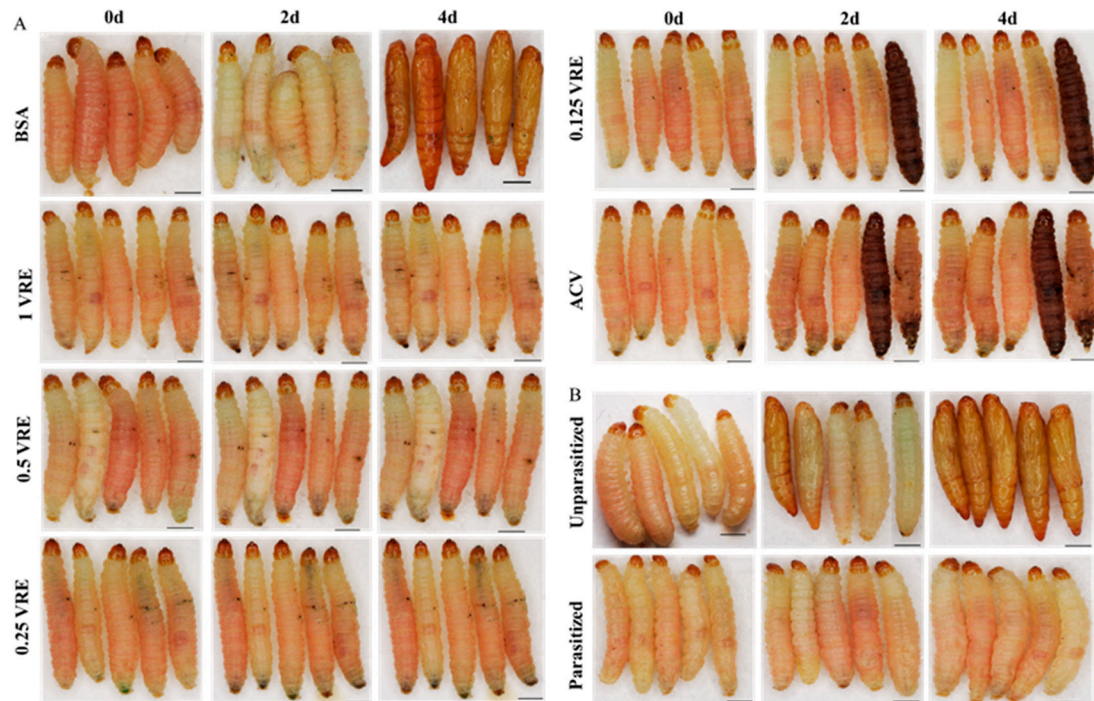

**Figure S1 Effect of the venom proteins on hosts.** (A)Effect of different equivalents of coarse venom and artificially collected venom proteins on hosts. VRE, venom reservoir equivalent; ACV, artificial collection venom from mimicked hosts; BSA, bovine serum albumin. (B) The unparasitized and parasitized hosts.

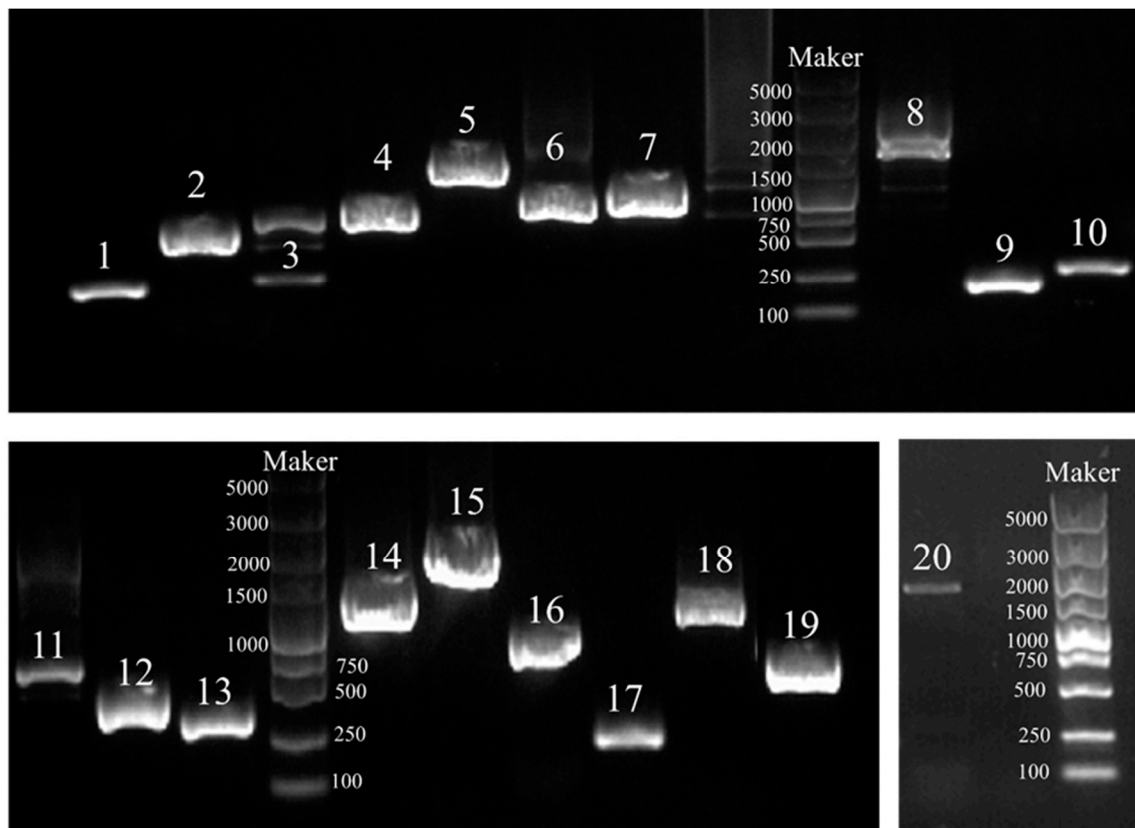

**Figure S2 The gel electrophoresis of 20 selected ACV PCR product fragments.** The serial numbers were marked above the target strip of each corridor. 1, Hheb062860.1; 2, Hheb016100.1; 3, Hheb070790.1; 4, Hheb002640.1; 5, Hheb104600.1; 6, Hheb120010.1; 7, Hheb035210.1; 8, Hheb057830.1; 9, Hheb020350.1; 10, Hheb056680.1; 11, Hheb015940.1; 12, Hheb000690.1; 13, Hheb084530.1; 14, Hheb026410.1; 15, Hheb024590.1; 16, Hheb016660.1; 17, Hheb064260.1; 18, Hheb106520.1; 19, Hheb005270.1; 20, Hheb093810.1. ACV, artificial collection venom from mimicked hosts; PCR, polymerase chain reaction.

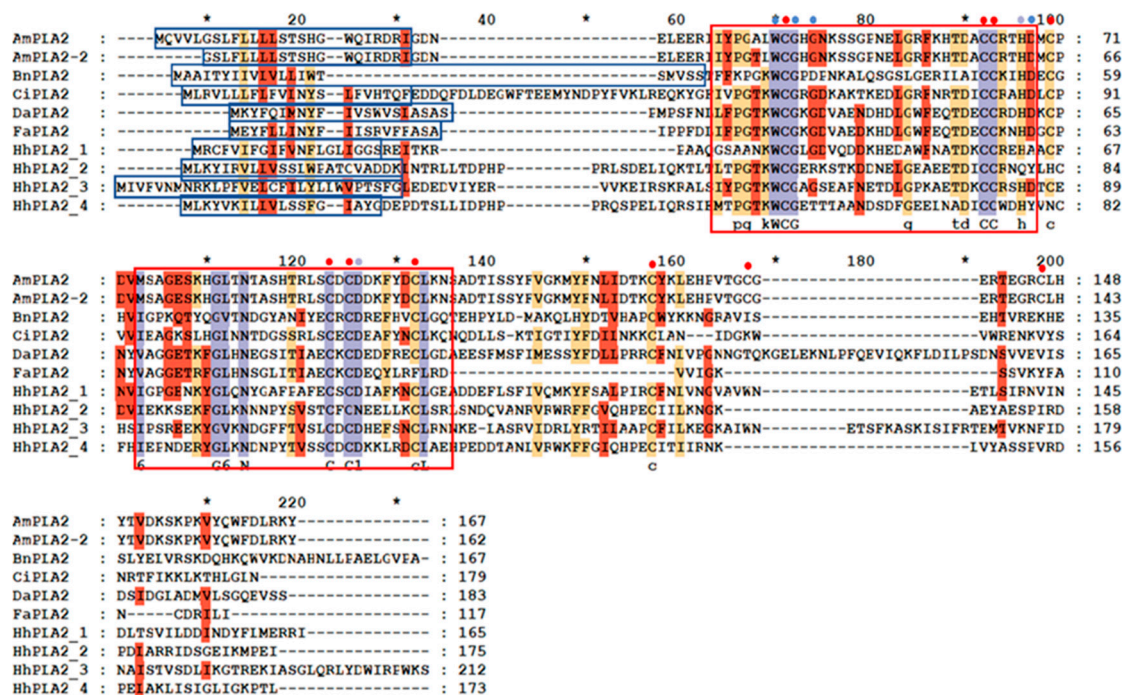

**Figure S3 Multiple sequence comparison of 8 phospholipase A2-like (PLA2) proteins.** Blue boxes indicate signal peptides. Red boxes indicate conserved structural domains. The dashes represent gaps introduced to maintain alignment. Red dots indicated conserved cysteine residues, blue dots indicated  $\text{Ca}^{2+}$  binding sites and purple dots indicate active sites. AmPLA2, AFI40558.1; AmPLA2-2, CAA34681.1; CiPLA2, XP\_034943085.1; DaPLA2, XP\_015109152.1; FaPLA2, XP\_011309464.1; HhPLA2\_1, Hheb079670.1<sup>2,3</sup>; HhPLA2\_2, Hheb088590.1<sup>1,2,3</sup>; HhPLA2\_3, Hheb112070.1<sup>2</sup>; HhPLA2\_4, Hheb088580.1<sup>1</sup>.
